# Supplementary material
Source: Springer Nature journal article supplement (https://www.springermedizin.de/resource/supplementary/12879_2009_1069_MOESM6_ESM.pdf/9442514)

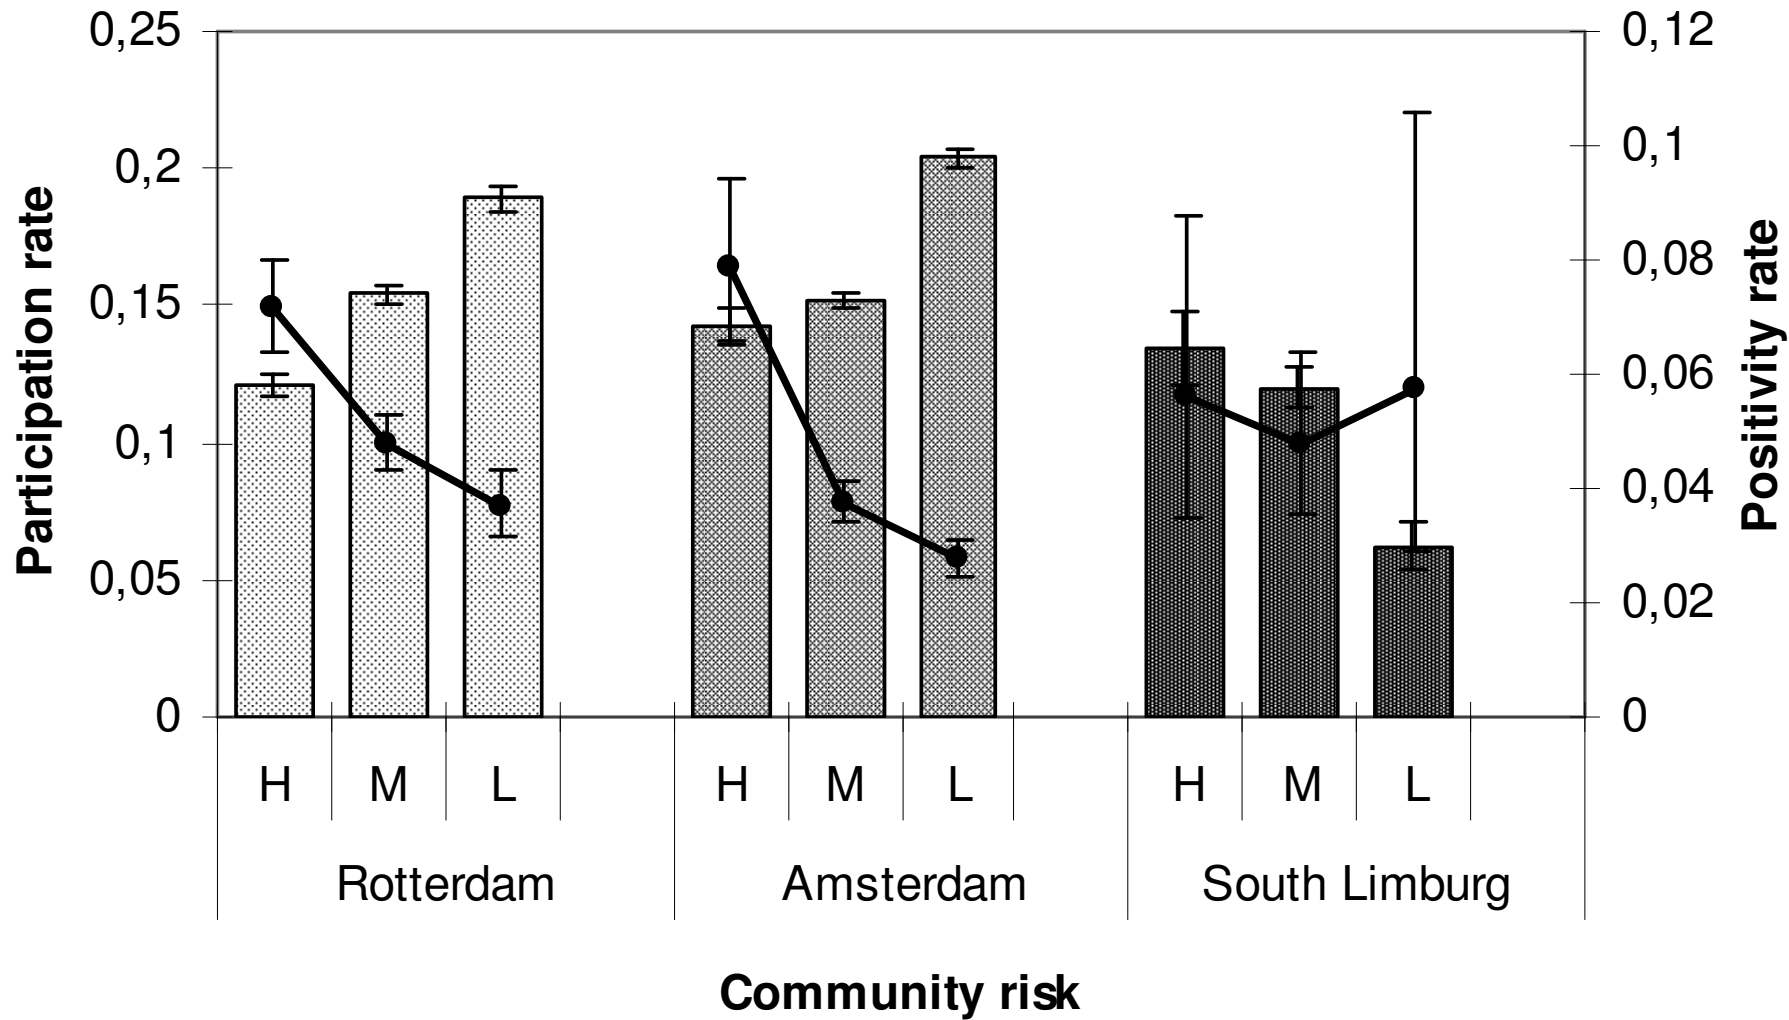

Supplement: MOESM6 [file 9442514]
